# Supplementary material for: Utilization of Traditional Korean Medicine Services by the Older Population: A Cross-Sectional Study
Source: MDPI journal article supplement (doi:10.3390/healthcare10081444), 2022-08-01
Supplement: s1 [file s1]

# **Utilization of Traditional Korean Medicine Services by the Older Population: A Cross-Sectional Study: A Survey**

**Managing Department**

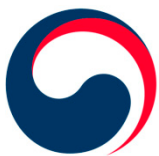

**Ministry of Health  
and Welfare**

**Agent in Charge of the Survey**

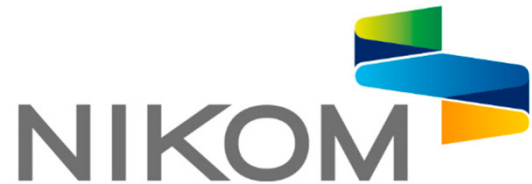

## [Objectives]

By collecting data to compared the older population (65 years and older) with the general population (19–64 years) to understand the current patterns in the use of TKM services by the older population. Using data from the 2017 National Survey of TKM Usage, we analyzed the main purpose and diseases or symptoms for TKM use, the reason for choosing TKM over other types of medicine, and the treatments provided.

## [Targets]

The data compared and analyzed in this study were from a subset of the 1,010 patients in the 2017 National Survey for Usage and Consumption of Traditional Korean Medicine

## [Items]

The survey items comprised two parts:

- 1. Basic characteristics: Gender, date of birth, married status, level of education, employment, income, state of health, type of health insurance**
- 2. TKM services utilization: purposes of using the TKM services, reason for choosing the TKM services, symptoms of using the TKM services**

## [Instructions]

The Ministry of Health and Welfare intends to conduct a survey to examine the current status of the utilization of TKM services. The contents of this questionnaire will be used in statistical analysis for academic purposes only, and any personal information will remain strictly confidential other than for statistical analyses.

- 1. All responses expected to be answered within 1 year of TKM services experience.**
- 2. All responses must reflect the current status as of the time of your completing of this questionnaire.**
- 3. If you cannot find the option that best describes your response, you can fill in the blanks with relevant information in (other \_\_\_\_\_).**

## **[PART 1. Basic Characteristics of Survey Group]**

### **1. Gender**

- ① Male ②Female

### **2. Date of birth**

(Year\_\_\_\_\_) (Month\_\_\_\_\_)

### **3. What is your married status?**

- ① Unmarried ② Married (bereaved, divorced and common-law included)

### **4. What level of education have you completed?**

- ① Primary or lower school graduate ② Middle school graduate ③ High school graduate ④University or higher school graduate

### **5. Are you currently employed?**

- ① Yes ② No

### **6. What was your average monthly household income in the last year?**

- ① Less than 1,500 USD ②1,500 USD less than 3,000 USD ③3,000 USD less than 4,500 USD ④4,500 USD less than 6,000 USD ⑤ No less than 6,000 USD

### **7. What is your current state of health?**

- ① Good ② Bad ③ Average

### **8. What type of national health insurance do you have?**

- ① Health insurance (district insurance) ② Health insurance (workplace insurance) ③ Medical care

## [PART 2. TKM services utilization of Survey Group]

### 1. What is the purposes of using TKM services for the past year?

① Treating a disease ② Health promotion ③ Cosmetic treatment ④ Treatment for car accident

### 2. What is the main reason for choosing the TKM services?

① High effective ② Less side effects of surgery and examination ③ Less side effects ④ Low cost of treatment ⑤ to hear the detailed explanation ⑥ Treatment specific to the disease ⑦ Clinic's being closer ⑧ Good facilities ⑨ Famous and recommendation

### 3. Please check all the disease/symptoms of the TKM services you have used over the past year and respond to the treated intervention in the below.

① Acupuncture ② Moxibustion ③ Cupping ④ Pharmacopuncture ⑤ Herbal medicine preparations ⑥ Herbal decoctions ⑦ Physiotherapy management of the TKM ⑧ Tuina techniques ⑨ Other (\_\_\_\_\_)

| Disease classification  | Diseases/Symptoms |                                         | Present=Yes<br>Absent=No<br>(circle) | Treated Intervention |
|-------------------------|-------------------|-----------------------------------------|--------------------------------------|----------------------|
| Musculoskeletal disease | 1                 | Back pain                               | Yes No                               |                      |
|                         | 2                 | Osteoarthritis                          | Yes No                               |                      |
|                         | 3                 | Lumbar Spine                            | Yes No                               |                      |
|                         | 4                 | Frozen shoulder<br>(shoulder pain)      | Yes No                               |                      |
|                         | 5                 | Cervical spine                          | Yes No                               |                      |
|                         | 6                 | Rheumatoid arthritis                    | Yes No                               |                      |
| Neurological disease    | 7                 | Disc related disease                    | Yes No                               |                      |
|                         | 8                 | Sprain(shoulder,<br>knee, wrist, ankle) | Yes No                               |                      |
|                         | 9                 | Sprain(neck)                            | Yes No                               |                      |
|                         | 10                | Abdominal damage                        | Yes No                               |                      |

| Disease classification  | Diseases/Symptoms |                        | Present=Yes<br>Absent=No<br>(circle) | Treated Intervention |
|-------------------------|-------------------|------------------------|--------------------------------------|----------------------|
|                         | 11                | Thoracic dislocation   | Yes No                               |                      |
|                         | 12                | Femoral damage         | Yes No                               |                      |
| Cerebrovascular disease | 13                | Headache               | Yes No                               |                      |
|                         | 14                | Facial nerve palsy     | Yes No                               |                      |
|                         | 15                | Partial paralysis      | Yes No                               |                      |
|                         | 16                | Sleep disorder         | Yes No                               |                      |
|                         | 17                | Parkinson's disease    | Yes No                               |                      |
| Cardiovascular disease  | 18                | Stroke of paralysis    | Yes No                               |                      |
|                         | 19                | High blood pressure    | Yes No                               |                      |
|                         | 20                | Ischemic heart disease | Yes No                               |                      |
| Cancer                  | 21                | Type of Cancer<br>( )  | Yes No                               |                      |
| Endocrine disease       | 22                | Diabetes               | Yes No                               |                      |
|                         | 23                | Thyroid disease        | Yes No                               |                      |
| Digestive disease       | 24                | Indigestion            | Yes No                               |                      |
|                         | 25                | Gastritis, enteritis   | Yes No                               |                      |
|                         | 26                | Bowel disorder         | Yes No                               |                      |

| Disease classification | Diseases/Symptoms |            | Present=Yes<br>Absent=No<br>(circle) | Treated Intervention |
|------------------------|-------------------|------------|--------------------------------------|----------------------|
| Respiratory disease    | 27                | Cold       | Yes No                               |                      |
|                        | 28                | Rhinitis   | Yes No                               |                      |
|                        | 29                | Bronchitis | Yes No                               |                      |

| Disease classification            | Diseases/Symptoms |                                | Present=Yes<br>Absent=No<br>(circle) | Treated Intervention |
|-----------------------------------|-------------------|--------------------------------|--------------------------------------|----------------------|
|                                   | 30                | Asthma                         | Yes No                               |                      |
|                                   | 31                | Pneumonia                      | Yes No                               |                      |
| Mental disease                    | 32                | Dementia                       | Yes No                               |                      |
|                                   | 33                | Mood disorder                  | Yes No                               |                      |
|                                   | 34                | Anxiety disorder               | Yes No                               |                      |
|                                   | 35                | Behavioral syndrome(ADHD, Tic) | Yes No                               |                      |
| Skin disease                      | 36                | Atopic dermatitis              | Yes No                               |                      |
|                                   | 37                | Rash, Urticaria                | Yes No                               |                      |
|                                   | 38                | Dry skin                       | Yes No                               |                      |
|                                   | 39                | Hyperhidrosis                  | Yes No                               |                      |
| Obstetrics and gynecology disease | 40                | Menstrual disorder             | Yes No                               |                      |
|                                   | 41                | Infertility                    | Yes No                               |                      |
|                                   | 42                | Urination disorder             | Yes No                               |                      |
|                                   | 43                | Prostate-related disease       | Yes No                               |                      |
| Disease in eyes and ears          | 44                | Tinnitus                       | Yes No                               |                      |
|                                   | 45                | Otitis media                   | Yes No                               |                      |
| Others                            | 46                | Pelvic pain                    | Yes No                               |                      |
|                                   | 47                | Dizziness                      | Yes No                               |                      |
|                                   | 48                | Cough                          | Yes No                               |                      |
|                                   | 49                | Hand tremor, Cramp             | Yes No                               |                      |

| Disease classification | Diseases/Symptoms |                                     | Present=Yes<br>Absent=No<br>(circle) | Treated Intervention |
|------------------------|-------------------|-------------------------------------|--------------------------------------|----------------------|
|                        | 50                | Skin            Sensory<br>disorder | Yes   No                             |                      |
|                        | 51                | (Other_____)                        | Yes   No                             |                      |
